# Supplementary material
Source: Copernicus journal article supplement (doi:10.5194/egusphere-2026-979)
Supplement: Supplementary file 2 [file egusphere-2026-979-supplement.pdf]

*Supplement of*

**Assessment of WRF-GHG model simulations during the CAFE-Brazil Campaign in Amazonia**

Noelia Rojas Benavente et al.

*Correspondence to:* Noelia Rojas Benavente (rnoeliab@gmail.com)

# A Sensitivity analysis of the WRF model

The Brazilian National Institute of Meteorology (INMET) operates an extensive network of meteorological stations across Brazil, providing essential data for weather forecasting, climate monitoring, and environmental research (Moura et al., 2016). These stations record key atmospheric variables such as temperature, humidity, precipitation, wind speed, and surface pressure. In this study, observations from 99 INMET stations located within the WRF-GHG model’s intermediate domain (D02) were used to evaluate near-surface meteorological conditions (see Table S1 and Fig. 1a, from main paper). These stations provide valuable spatial coverage over the central and northern Amazon, enabling a robust comparison between model simulations and ground-based measurements.

Given the wide spatial distribution of INMET stations across Brazil, both observed and simulated meteorological data were grouped and averaged across four defined regions (see Fig. 1a, from main paper). This subsection presents a sensitivity analysis of the WRF (Weather Research and Forecasting) model, aimed at understanding the impact of various model configurations on the simulation of atmospheric conditions, particularly in the context of greenhouse gas (GHG) concentrations such as  $CO_2$  and  $CH_4$ . Sensitivity analyses are critical in assessing how different parameterizations and input conditions influence model performance, especially for complex, large-scale simulations like those used in atmospheric modeling over the Amazon region.

Table S 1: INMET Stations distributed over our analysis domain.

| Region  | Stations                  | Latitude | Longitude | $T_{2m}$ | $RH_{2m}$ | $WS_{10m}$ | $WD_{10m}$   | Region                    | Stations              | Latitude | Longitude | $T_{2m}$ | $RH_{2m}$ | $WS_{10m}$ | $WD_{10m}$ |
|---------|---------------------------|----------|-----------|----------|-----------|------------|--------------|---------------------------|-----------------------|----------|-----------|----------|-----------|------------|------------|
| R1      | Autazes                   | -3.58    | -59.12    | X        | X         | X          | X            | R2                        | Belen                 | -1.41    | -48.43    | X        | X         | X          | X          |
|         | Barcelos                  | -0.98    | -62.92    | X        | X         | X          | X            |                           | Breves                | -1.68    | -50.47    | X        | X         | X          | X          |
|         | Coari                     | -4.09    | -63.14    | X        | X         | X          | X            |                           | Cameta                | -2.23    | -49.49    | X        | X         | X          | X          |
|         | Itacoatiara               | -3.13    | -58.48    | X        | X         | X          | X            |                           | Itaubal               | 0.56     | -50.82    | X        | X         | X          | X          |
|         | Itaituba                  | -4.27    | -55.99    | X        | X         | X          | X            |                           | Macapa                | 0.03     | -51.08    | X        | X         | X          | X          |
|         | Manacapuru                | -3.29    | -60.62    | X        | X         | X          | X            |                           | Oiapoque              | 3.81     | -51.86    | X        | X         | X          | X          |
|         | Manaus                    | -3.10    | -60.01    | X        | X         | X          | X            |                           | Porto de Moz          | -1.82    | -52.11    | X        | X         | X          | X          |
|         | Maues                     | -3.39    | -57.67    | X        | X         | X          | X            |                           | Porto Grande          | 0.69     | -51.40    | X        | X         | X          | X          |
|         | Monte Alegre              | -2.0     | -54.07    | X        | X         | X          | X            |                           | Soure                 | -0.72    | -48.51    | X        | X         | X          | X          |
|         | Obidos                    | -1.88    | -55.51    | X        | X         | X          | X            |                           | Tome Acu              | -2.59    | -48.36    | X        | X         | X          | X          |
|         | Parintins                 | -2.63    | -56.75    | X        | X         | X          | X            |                           | Altamira              | -3.27    | -52.39    | X        | X         | X          | X          |
|         | Placas                    | -3.86    | -54.21    | X        | X         | X          | X            |                           | Araguaina             | -7.10    | -48.20    | X        | X         | X          | X          |
|         | Presidente Figueiredo     | -2.05    | -60.02    | X        | X         | X          | X            |                           | Araguatins            | -5.64    | -48.11    | X        | X         | X          | X          |
|         | Rio Urubu                 | -2.63    | -59.60    | X        | X         | X          | X            |                           | Colinas               | -8.09    | -48.47    | X        | X         | X          | X          |
|         | G. Da Cachoeira           | -0.12    | -67.06    | X        | X         | X          | X            |                           | Conceicao do Araguaia | -8.30    | -49.28    | X        | X         | X          | X          |
|         | Santarem                  | -2.50    | -54.72    | X        | X         | X          | X            |                           | Maraba                | -5.36    | -49.05    | X        | X         | X          | X          |
| Urucara | -2.53                     | -57.75   | X         | X        | X         | X          | Marianopolis | -9.57                     | -49.72                | X        | X         | X        | X         |            |            |
| R2      | Apiacas                   | -9.56    | -57.39    | X        | X         | X          | X            | Medicilandia              | -3.51                 | -52.96   | X         | X        | X         | X          |            |
|         | Apui                      | -7.20    | -59.88    | X        | X         | X          | X            | Novo Repartimento         | -4.24                 | -49.93   | X         | X        | X         | X          |            |
|         | Ariquemes                 | -9.94    | -62.96    | X        | X         | X          | X            | Pacaja                    | -3.84                 | -50.63   | X         | X        | X         | X          |            |
|         | Boca do Acre              | -8.77    | -67.33    | X        | X         | X          | X            | Pedro Afonso              | -8.96                 | -48.17   | X         | X        | X         | X          |            |
|         | Carlinda                  | -9.97    | -55.82    | X        | X         | X          | X            | Redencao                  | -8.04                 | -50.00   | X         | X        | X         | X          |            |
|         | Cotriguagu                | -9.90    | -58.57    | X        | X         | X          | X            | Rondon do Para            | -4.82                 | -48.17   | X         | X        | X         | X          |            |
|         | Eirunepe                  | -6.65    | -69.86    | X        | X         | X          | X            | Santa Fe do Araguaia      | -7.12                 | -48.78   | X         | X        | X         | X          |            |
|         | Guaranta Do Norte         | -9.95    | -54.89    | X        | X         | X          | X            | Santa Maria Das Barreiras | -8.72                 | -49.85   | X         | X        | X         | X          |            |
|         | Humaita                   | -7.55    | -63.07    | X        | X         | X          | X            | Santana do Araguaia       | -9.33                 | -50.35   | X         | X        | X         | X          |            |
|         | Labrea                    | -7.26    | -64.78    | X        | X         | X          | X            | Sao Feliz do Xingu        | -6.63                 | -51.95   | X         | X        | X         | X          |            |
| R3      | Manicore                  | -5.78    | -61.28    | X        | X         | X          | X            | Serra dos Carajas         | -6.07                 | -50.14   | X         | X        | X         | X          |            |
|         | Mina do Palito            | -6.31    | -55.78    | X        | X         | X          | X            | Tucuma                    | -6.74                 | -51.14   | X         | X        | X         | X          |            |
|         | Novo Aripuana             | -8.09    | -60.38    | X        | X         | X          | X            | Tucurui                   | -3.82                 | -49.67   | X         | X        | X         | X          |            |
|         | Parque Estadual Chandless | -9.35    | -69.92    | X        | X         | X          | X            | Xinguara                  | -7.11                 | -49.92   | X         | X        | X         | X          |            |
|         | Porto Velho               | -8.79    | -63.84    | X        | X         | X          | X            |                           |                       |          |           |          |           |            |            |
|         | Rio Branco                | -9.67    | -68.16    | X        | X         | X          | X            |                           |                       |          |           |          |           |            |            |
|         |                           |          |           |          |           |            |              |                           |                       |          |           |          |           |            |            |
|         |                           |          |           |          |           |            |              |                           |                       |          |           |          |           |            |            |
|         |                           |          |           |          |           |            |              |                           |                       |          |           |          |           |            |            |
|         |                           |          |           |          |           |            |              |                           |                       |          |           |          |           |            |            |

The value "x" represents the existence of meteorological variables available for each station.

The WRF-GHG model’s surface meteorological outputs were compared to hourly data from 99 INMET stations across four Brazilian climate regions (Fig. S1). The model reproduces the diurnal cycles of  $T_{2m}$  and  $RH_{2m}$  well, with

the WGY-Test configuration slightly outperforming the MGM-Test. Wind speed shows more variability, with both under- and overestimations, but overall trends are preserved. Wind direction, however, remains challenging to model due to sensitivity to local turbulence and topography. A Taylor diagram (Fig. S2) shows strong correlations ( $R \leq 0.95$ ) for temperature and humidity, with WGY-Test slightly outperforming MGM-Test in most regions. Wind speed correlations are weaker ( $R \leq 0.6$ ), though WGY-Test offers slight improvement over MGM-Test.

Table S 2: Physical scheme in WRF-GHG model for sensitivity analysis.

| Physical scheme                           | WGY-Test                    | MGM-Test                         |
|-------------------------------------------|-----------------------------|----------------------------------|
| Microphysics scheme                       | Morrison 2-moment Scheme    | WRF Single-moment 6-class Scheme |
| Cumulus parameterization                  | Grell 3D Ensemble Scheme    | Grell-Devenyi Ensemble Scheme    |
| Planetary boundary scheme                 | Mellor-Yamada-Janjic Scheme | Yonsei University Scheme         |
| Short-wave and Long-wave radiation scheme | CAM Schemes                 | RRTMG Schemes                    |
| Land surface model                        | Unified Noah Land Surface   | Unified Noah Land Surface        |
| Surface Layer                             | Revised MM5                 | Revised MM5                      |

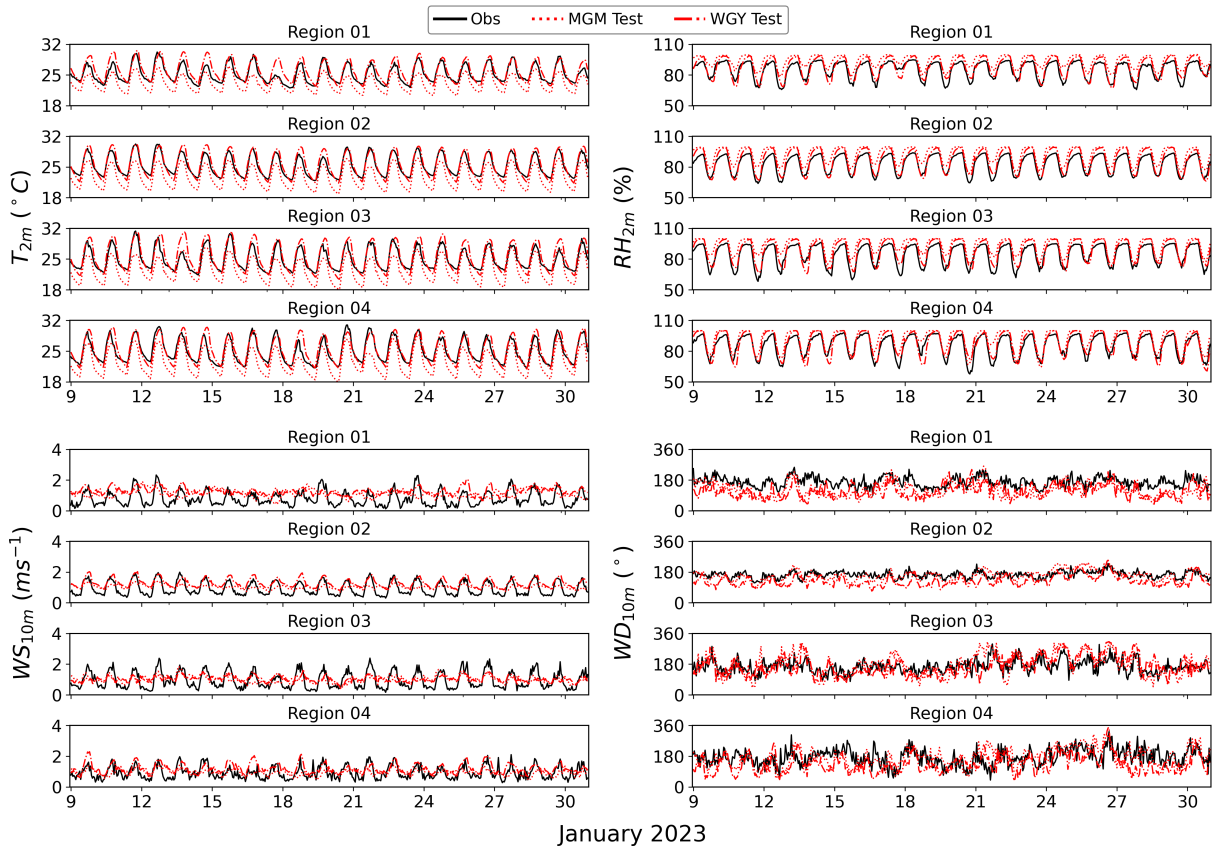

Figure S 1: Time series comparison of observed (Obs) and modeled meteorological variables from two WRF simulations (MGM Test - red dotted line; WGY Test - red dashed line) across four regions during January 2023. Variables include 2-meters air temperature ( $T_{2m}$ ,  $^{\circ}\text{C}$ ), 2-meters relative humidity ( $RH_{2m}$ , %), 10-meters wind speed ( $WS_{10m}$ , m/s), and 10-meters wind direction ( $WD_{10m}$ ,  $^{\circ}$ )

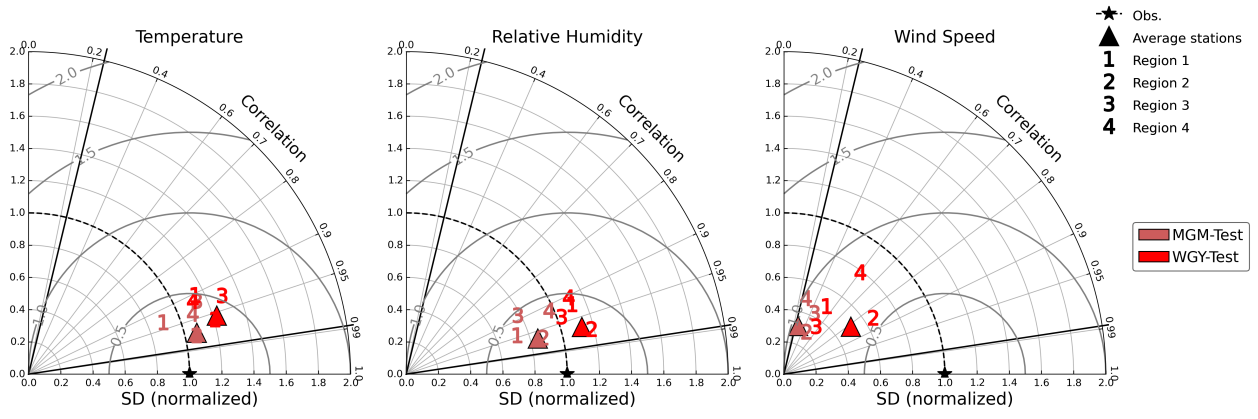

Figure S 2: Taylor diagram depicting the performance of the WRF-GHG simulations (MGM-Test and WGY-Test) in comparison with INMET stations across the four selected regions. The diagram highlights the correlation, standard deviation, and overall model efficiency in relation to the observed data for temperature, relative humidity, and wind speed.

## B Figures and Tables

### B.1 WRF meteorological evaluation

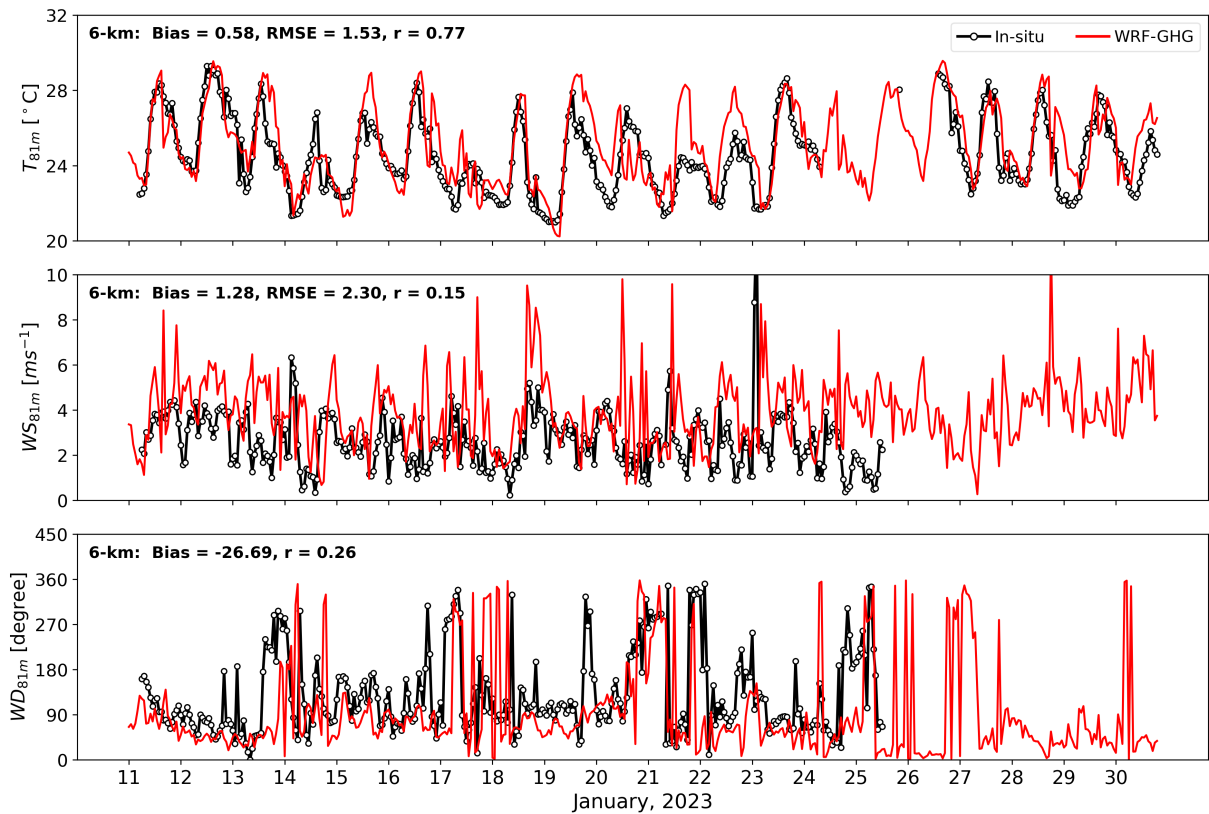

Figure S 3: Time series comparison of observed and modeled meteorological variables at the ATTO site (Amazon Tall Tower Observatory) during January 2023. Variables include 81-meters air temperature ( $T_{81m}$ , °C), 81-meters wind speed ( $WS_{81m}$ , m/s), and 81-meters wind direction ( $WD_{81m}$ , °).

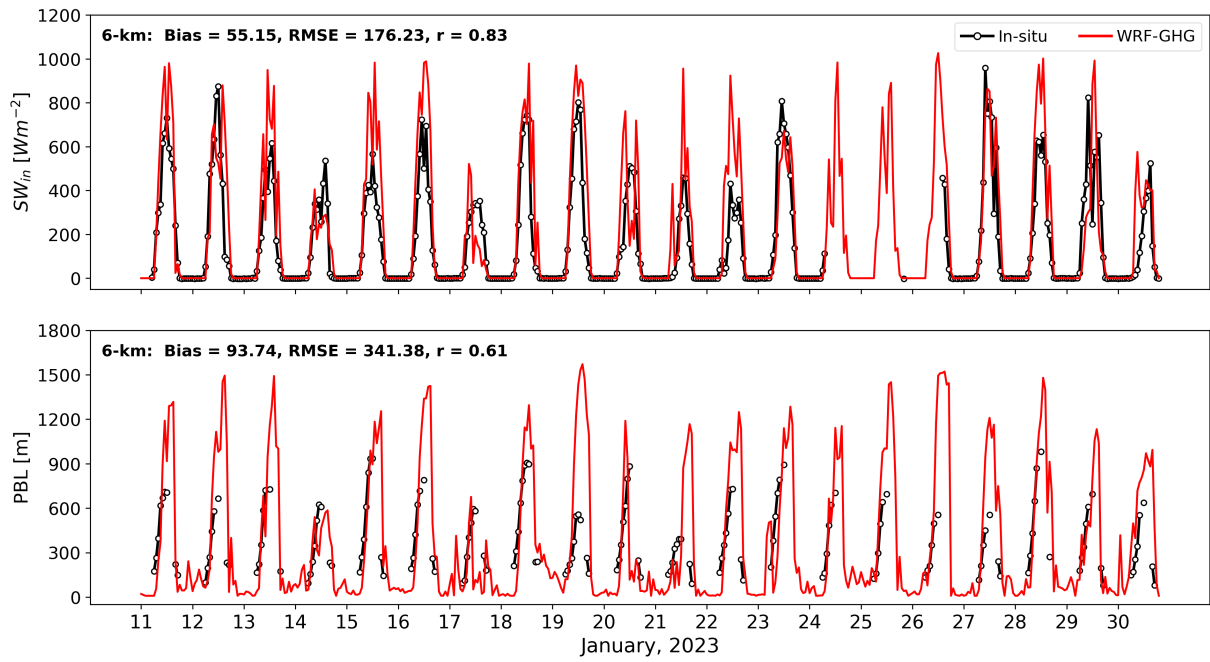

Figure S 4: Time series comparison of observed and modeled meteorological variables at the ATTO site (Amazon Tall Tower Observatory) during January 2023. Variables include radiation ( $SW_{81m}$ ,  $Wm^{-2}$ ) and Planetary Boundary Layer (PBL, m).

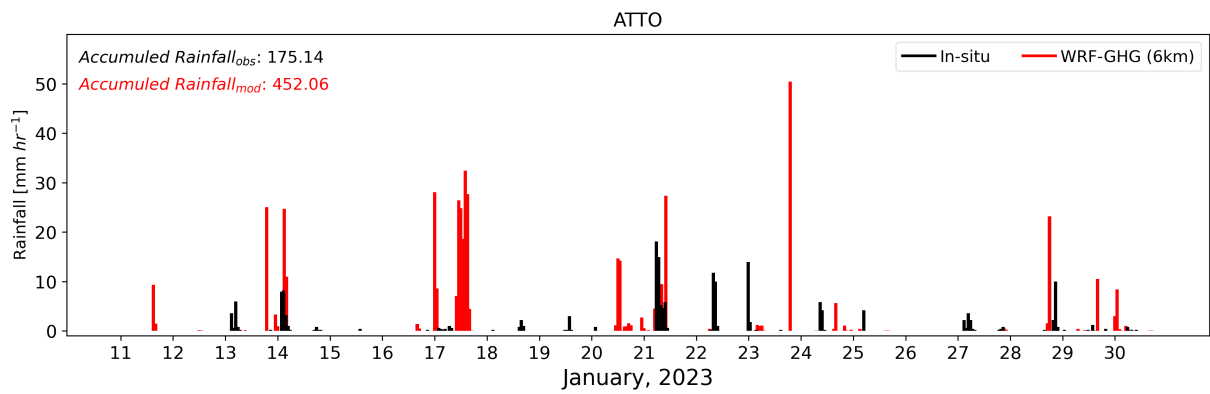

Figure S 5: Time series comparison of observed and modeled precipitation at the ATTO site (Amazon Tall Tower Observatory) during January 2023.

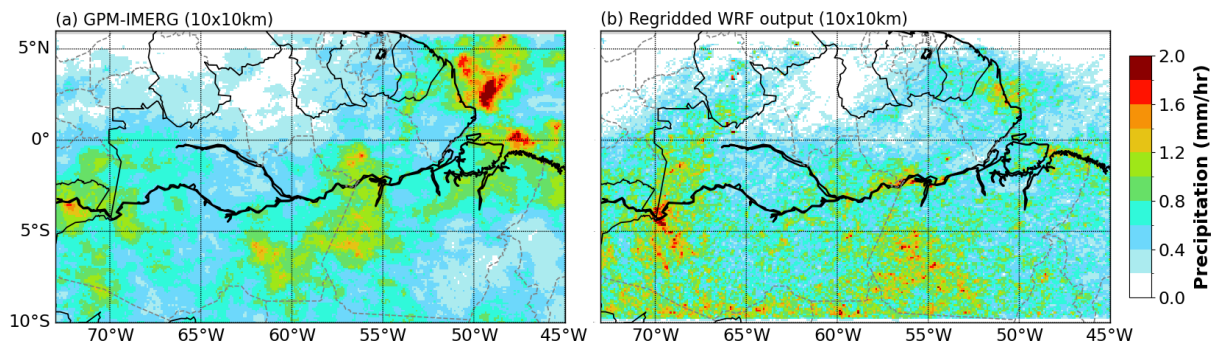

Figure S 6: Spatial distribution of mean precipitation (mm/h) for the period 11–30 January 2023, regridded to a  $10 \times 10$  km resolution for intercomparison. Left: GPM satellite-derived precipitation. Right: WRF simulation.

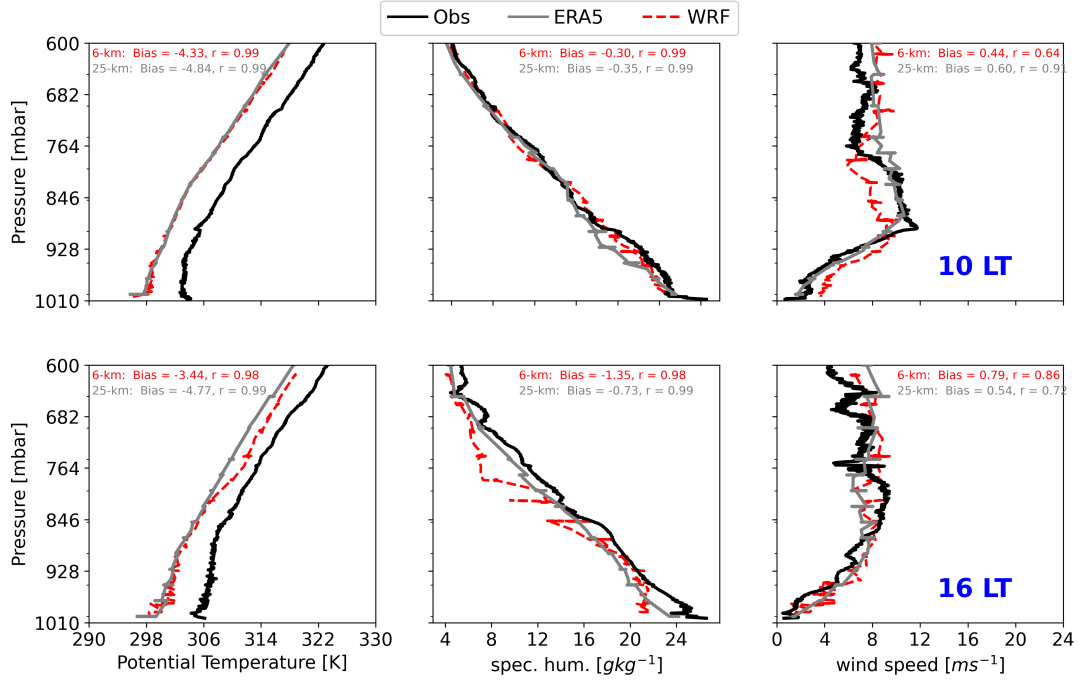

Figure S 7: Vertical profiles of potential temperature (left), specific humidity (middle), and wind speed (right) at 14 UTC (top row) and 20 UTC (bottom row). Observations from radiosondes are shown in black, ERA5 reanalysis in gray, WRF simulations in dotted red.

Table S 3: Statistical comparison of observed and simulated hourly data from the CAFE-Brazil flight on 14 January 2023.

|             | Potential Temperature (K) | Specific Humidity (g/kg) | Wind Speed (m/s) | Vertical Velocity (m/s) |
|-------------|---------------------------|--------------------------|------------------|-------------------------|
| Pearson (r) | 0.99                      | 0.98                     | 0.75             | -0.11                   |
| MB          | -0.90                     | 0.93                     | -0.58            | 0.40                    |
| RMSE        | 3.25                      | 1.93                     | 3.08             | 1.23                    |

## B.2 Evaluation of WRF-GHG tracer simulations against in-situ observations

Table S 4: Set of VPRM parameters used in the VPRM-Default and VPRM-optimized simulations

|          | $T_{min}$ | $T_{opt}$ | $T_{max}$ | Default   |         |          |         | Calibrated (Botía et al., 2025) |         |          |         |
|----------|-----------|-----------|-----------|-----------|---------|----------|---------|---------------------------------|---------|----------|---------|
|          |           |           |           | $\lambda$ | $PAR_0$ | $\alpha$ | $\beta$ | $\lambda$                       | $PAR_0$ | $\alpha$ | $\beta$ |
| EF=1     | 0         | 20        | 40        | -0.2101   | 501     | 0.1601   | 0       | -0.1096                         | 993.9   | 0.2114   | 1.8187  |
| DF=2     | 0         | 20        | 40        | -0.1729   | 324     | 0.3258   | 0       | -0.1729                         | 324     | 0.3258   | 0       |
| MF=3     | 0         | 20        | 40        | -0.2555   | 206     | 0.3422   | 0       | -0.2555                         | 206     | 0.3422   | 0       |
| SHR=4    | 2         | 20        | 40        | -0.0874   | 303     | 0.0239   | 0       | -0.0874                         | 303     | 0.0239   | 0       |
| SAV=5    | 2         | 20        | 40        | -0.1141   | 682     | 0.0049   | 0       | -0.0277                         | 6860.7  | -0.2535  | 7.1125  |
| CRO=6    | -5        | 22        | 40        | -0.1209   | 646     | 0.0043   | 0       | -0.0417                         | 2329    | -0.0814  | 3.6716  |
| GRA=7    | 2         | 18        | 40        | -0.1334   | 157     | 0.0269   | 0       | -0.0568                         | 15475.5 | -0.3122  | 7.3377  |
| others=8 | 0         | 0         | 40        | 0         | 0       | 0        | 0       | 0                               | 0       | 0        | 0       |

Table S 5: Biomass for the VPRM classes

| VPRM Classes | (1)<br>Evergreen                  | (2)<br>Deciduous                  | (3)<br>Mixed forest | (4)<br>Shrubland                       | (5)<br>Savannas                | (6)<br>Cropland                          | (7)<br>Grassland | (8)<br>Others                                                                                            |
|--------------|-----------------------------------|-----------------------------------|---------------------|----------------------------------------|--------------------------------|------------------------------------------|------------------|----------------------------------------------------------------------------------------------------------|
| MapBiomass   | - E. Needleleaf<br>- E. Broadleaf | - D. Needleleaf<br>- D. Broadleaf | - Mixed forest      | - Closed Shrubland<br>- Open Shrubland | - Woody Savannas<br>- Savannas | - Croplands<br>- Cropland and Vegetation | - Grassland      | - Permanent Wetlands<br>- Urban<br>Snow and Ice<br>Barren or Sparsely vegetated<br>Water Bodies<br>Lakes |

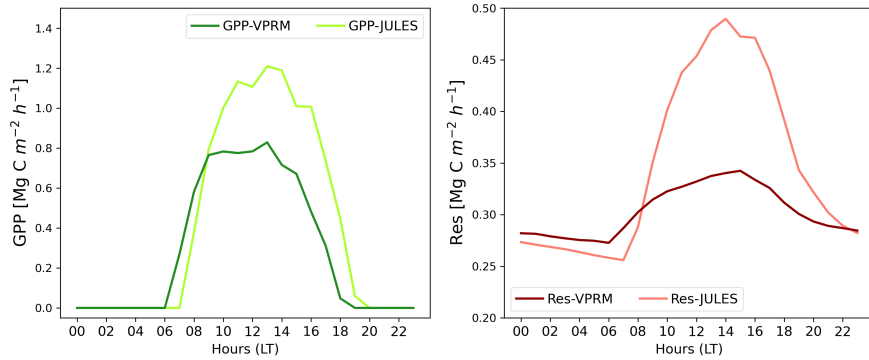

Figure S 8: Diurnal cycle of ecosystem carbon fluxes simulated by two models. Left panel: Gross Primary Productivity (GPP) from VPRM (dark green line) and JULES (light green line). Right panel: Ecosystem respiration (Res) from VPRM (dark red line) and JULES (salmon line).

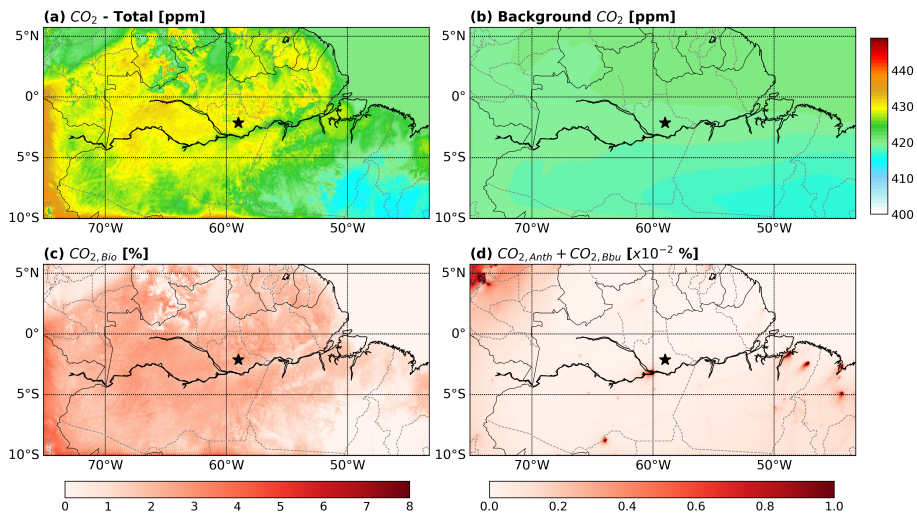

Figure S 9: Spatial distribution of total and source-partitioned carbon dioxide ( $\text{CO}_2$ ) concentration simulated with the WRF-GHG model extracted at 81 meters. The panels show  $\text{CO}_2$  total concentration (top-left), background  $\text{CO}_2$  concentration (top-right), biogenic  $\text{CO}_2$  (bottom-left) and anthropogenic + biomass burning  $\text{CO}_2$  (bottom-right). Stars indicate the ATTO site location.

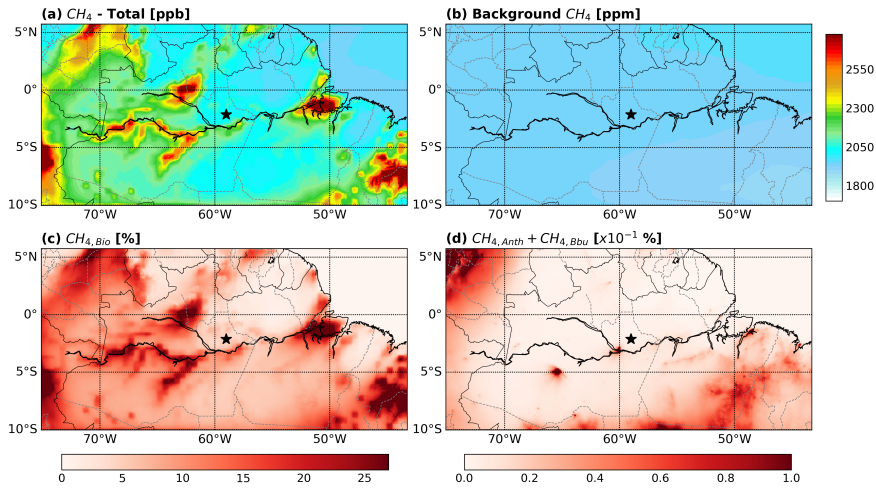

Figure S 10: Spatial distribution of total and source-partitioned methane ( $CH_4$ ) concentration simulated with the WRF-GHG model extracted at 81 meters. The panels show  $CH_4$  total concentration (top-left), background  $CH_4$  concentration (top-right), biogenic  $CH_4$  (bottom-left) and anthropogenic + biomass burning  $CH_4$  (bottom-right). Stars indicate the ATTO site location.

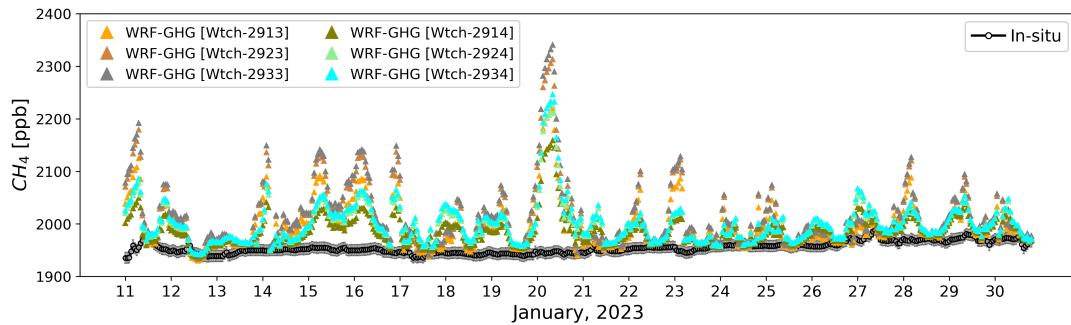

Figure S 11: Time series of total  $CH_4$  concentration at INSTANT tower during January 2023, comparing observations (black circles) with simulations using Six-Model WetCharts ensemble for wetland fluxes.

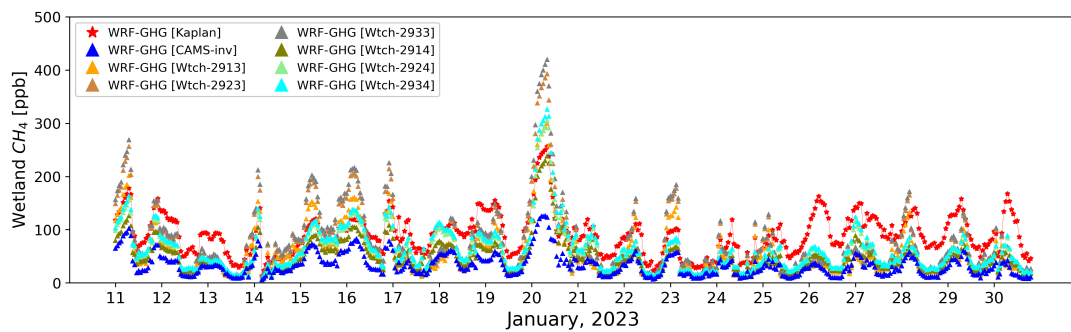

Figure S 12: Temporal variability of simulated  $CH_4$  concentrations from wetlands sources over the Instant tower during January 2023, as represented by three emission inventories: Kaplan (red stars), CAMS-Inversion (blue triangles), and the Wetcharts ensemble (Wetch-2913 to Wetch-2934; colored triangles).

Figure S13 illustrates the  $CH_4$  biogenic fluxes, advection patterns, and in-situ measurements at the ATTO Tower in January 2023. Panel (a) shows the  $CH_4$  fluxes around ATTO, a selected region within D02, where biogenic methane sources could have a more significant impact on the ATTO area, with higher fluxes indicated by warmer colors. The region around the ATTO Tower is highlighted with a red box, showing significant flux variations. On the right side of the panel, a mask of  $CH_4$  emission sources is provided, where areas in red represent regions with higher emissions, and areas in blue indicate lower emissions, with the ATTO Tower marked by a star. Panel (b) presents the advection patterns for two time periods: daytime (08:00–18:00 LT) on the left and nighttime (19:00–07:00 LT) on the right. The advection is shown in terms of  $\text{ppb s}^{-1}$ , with red and blue colors reflecting the movement of  $CH_4$  towards and away from the tower, respectively, while the black arrows indicate the mean wind direction. Panel (c) displays the wind vectors and the transport of  $CH_4$  towards the ATTO Tower during the day and night. The wind vectors are overlaid with shading that indicates the strength of  $CH_4$  transport, where red shows  $CH_4$  moving towards the tower and blue indicates movement away from it. The color bar shows wind speed in m/s. Finally, panel (d) provides a time series of simulated  $CH_4$  concentrations at the ATTO Tower (black dashed line) and from a river source (red line) throughout January 2023, showing the fluctuations in  $CH_4$  levels influenced by biogenic emissions at the tower and nearby river sources. This figure provides a detailed view of the regional  $CH_4$  dynamics, highlighting the contribution of biogenic fluxes, wind patterns, and the advection of  $CH_4$  to the ATTO Tower site.

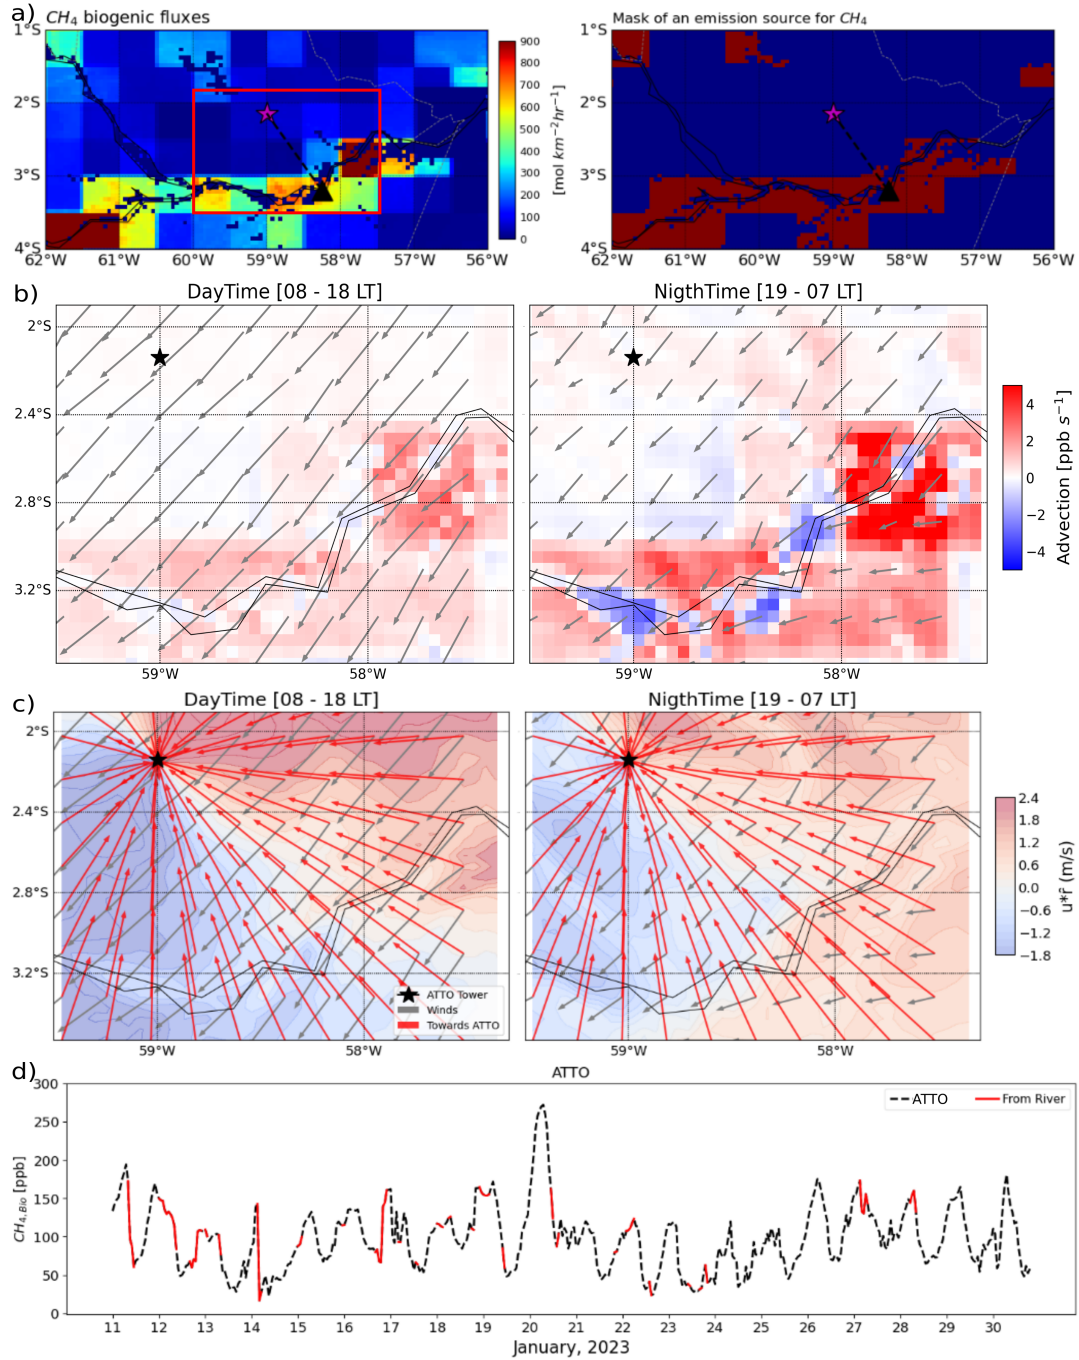

Figure S 13:  $CH_4$  biogenic fluxes, advection patterns, and in-situ measurements at the ATTO Tower in January 2023. (a)  $CH_4$  fluxes (left) and mask of a  $CH_4$  emission source (right) in the study region. (b) Advection patterns for daytime (08:00-18:00 LT) and nighttime (19:00-07:00 LT). (c) Wind vectors and  $CH_4$  transport towards the ATTO Tower during the day and night. (d) Time series of simulated biogenic  $CH_4$  concentrations at the ATTO Tower (black dashed line) and from the river source (red line).

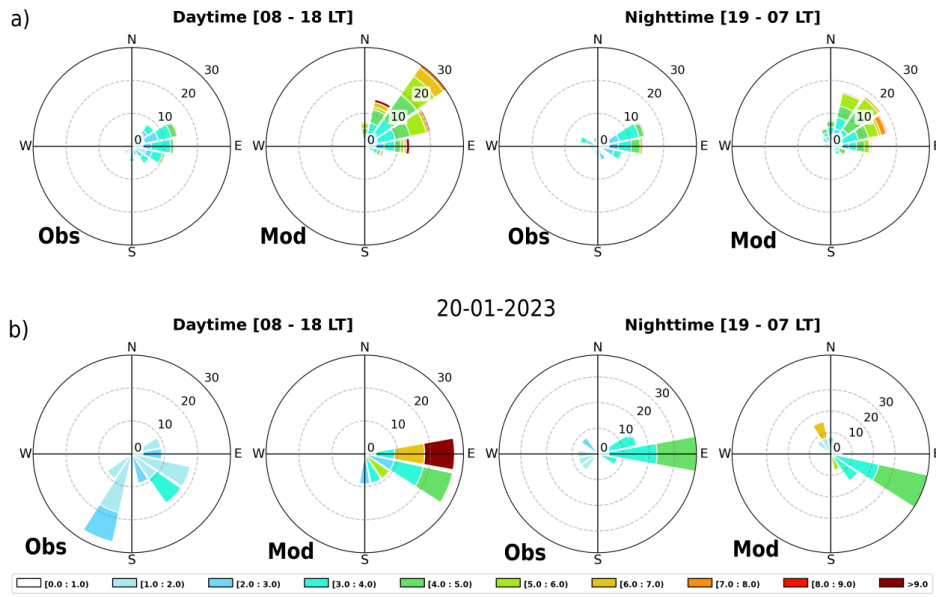

Figure S 14: Wind rose charts showing the wind fields during the daytime and nighttime: (a) for January 2023, and (b) for January 20, 2023, when the model simulated a peak in  $CH_4$  concentrations.

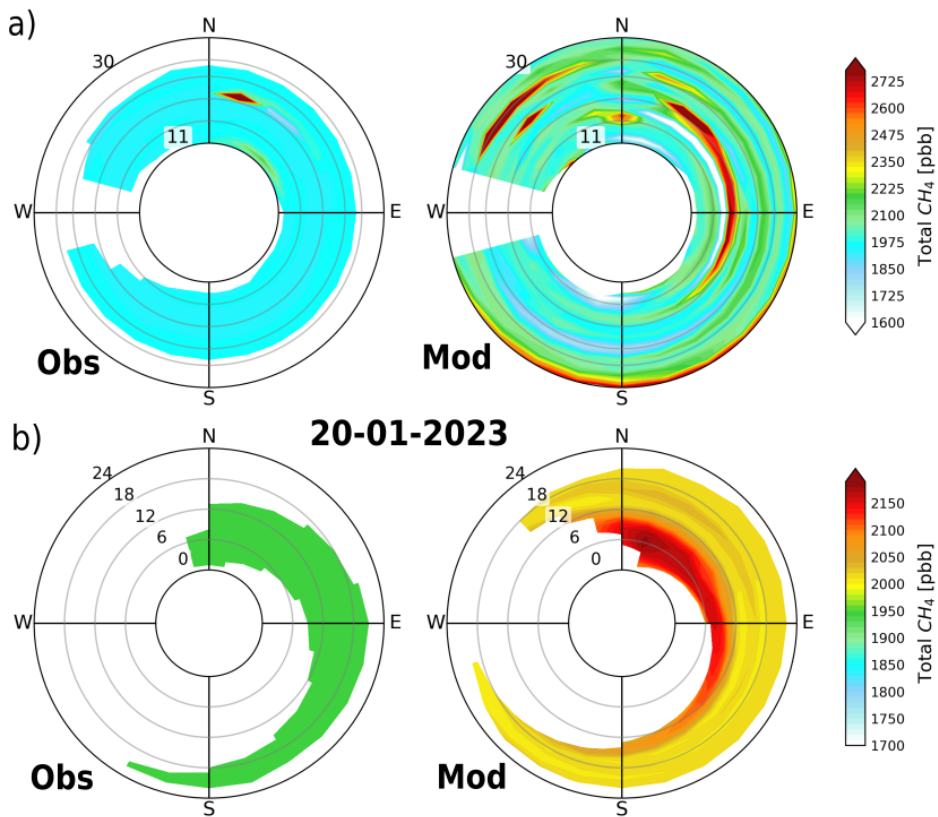

Figure S 15: Wind rose charts showing observed (left) and simulated (right)  $CH_4$  concentrations at the ATTO site for (a) January 2023, and (b) January 20, 2023. The simulated data were considered by the Kaplan inventory.

## C WRF-GHG simulation set-up

A detailed description on how to run WRF-GHG can be found in Beck et al., (2011); here, only the initialization procedure specific to our study is summarized. Typically, a daily simulation with WRF-GHG is performed over a 30h period, including a 6h meteorological spin-up from 18:00 to 24:00 UTC of the previous day, followed by a 24h simulation of tracer transport for the actual simulation day (Beck et al., 2011). In our case, however, a 10-day spin-up was used, so daily simulations start from the last day of the spin-up. To avoid negative tracer values, a small constant offset is applied to the WRF boundary fields of biospheric  $CO_2$  ( $= 400$ ) and the soil sink  $CH_4$  ( $=1.8$ ) at the start of each run. This offset is later subtracted during post-processing.

Meteorological conditions are updated daily using external data (ERA5). Tracers for total and background  $CO_2$  and  $CH_4$  fluxes are initialized on the first day of the simulation period using CAMS-Inversion, along with the lateral boundary conditions of the outer domain (D01). For subsequent days, the tracers are taken from the final WRF output of the previous day, ensuring continuity of the simulation. The  $CO_2$  tracer for VPRM and the  $CH_4$  tracer for soil uptake are also initialized with a constant offset to prevent negative values caused by vegetation respiration (Beck et al., 2011). Other flux tracers are initialized daily using external data sources to provide updated emission information for each tracer.
